# Supplementary material for: Association of Variability in Body Mass Index and Metabolic Health With Cardiometabolic Disease Risk
Source: PubMed Central journal article supplement — J Am Heart Assoc. 2019 Mar 22;8(7):e010793. doi: 10.1161/JAHA.118.010793 (PMC6509716; doi:10.1161/jaha.118.010793), 2019-03-22
Supplement: JAH3-8-e010793-s001.pdf [file JAH3-8-e010793-s001.pdf]

# **SUPPLEMENTAL MATERIAL**

**Table S1. Cross-Tabulation of Obesity with BMI Variability and Metabolic Health with Metabolic Health Variability.**

|                                                              | Stable BMI<br>(BMI VIM in quintile 1-4)                                                  | Variable BMI<br>(BMI VIM in quintile 5)                                                 |
|--------------------------------------------------------------|------------------------------------------------------------------------------------------|-----------------------------------------------------------------------------------------|
| Non-obese (BMI < 30 kg/m <sup>2</sup> )                      | Stable BMI,<br>non-obese<br><b>(SNO)</b>                                                 | Variable BMI,<br>non-obese<br><b>(VNO)</b>                                              |
| Obese<br>(BMI ≥ 30 kg/m <sup>2</sup> )                       | Stable BMI,<br>obese<br><b>(SO)</b>                                                      | Variable BMI,<br>obese<br><b>(VO)</b>                                                   |
|                                                              | Stable Metabolic Health<br>(<2 metabolic health<br>conditions with VIM in quintile<br>5) | Variable Metabolic Health (≥2<br>metabolic health conditions<br>with VIM in quintile 5) |
| Metabolically healthy<br>(<2 metabolic health<br>conditions) | Stable metabolic health,<br>metabolically healthy <b>(SMH)</b>                           | Variable metabolic health,<br>metabolically healthy <b>(VMH)</b>                        |
| Metabolically unhealthy (≥2<br>metabolic health conditions)  | Stable metabolic health,<br>metabolically unhealthy<br><b>(SMU)</b>                      | Variable metabolic health,<br>metabolically unhealthy<br><b>(VMU)</b>                   |

**Table S2. Baseline Characteristics of Offspring Cohort Participants Included In and Excluded From the Analysis.**

|                                  | Included     | Excluded      |
|----------------------------------|--------------|---------------|
| n                                | 3,632        | 1,492         |
| Men*                             | 1,669 (46.0) | 814 (54.6)    |
| Age, years†                      | 34.8 (9.9)   | 40.0 (10.9)   |
| BMI, kg/m <sup>2</sup> †         | 25.1 (4.3)   | 26.1 (4.7)    |
| With obesity*                    | 428 (11.8)   | 258 (17.3)    |
| Serum triglycerides, mg/dL†      | 91.9 (62.8)  | 119.0 (117.9) |
| High triglycerides*              | 430 (12.0)   | 306 (21.0)    |
| Serum HDL, mg/dL†                | 51.3 (14.6)  | 48.5 (14.7)   |
| Low HDL*                         | 1,196 (33.6) | 597 (41.0)    |
| Systolic blood pressure, mm Hg†  | 120.0 (14.7) | 126.6 (19.4)  |
| Diastolic blood pressure, mm Hg† | 77.6 (10.1)  | 81.1 (12.2)   |
| High blood pressure*             | 1,782 (49.2) | 929 (62.6)    |
| Blood glucose, mg/dL†            | 100.8 (10.6) | 105.9 (23.7)  |
| High glucose*                    | 50 (1.4)     | 97 (6.8)      |
| Education, years†                | 14.1 (2.6)   | 13.2 (2.6)    |
| Smoking*                         |              |               |
| Never                            | 1,236 (35.2) | 344 (23.4)    |
| Former                           | 749 (21.3)   | 220 (15.0)    |
| Current                          | 1,527 (43.5) | 904 (61.7)    |
| Death prior to examination 4†    | 0 (0.0)      | 239 (16.0)    |

\*Presented as n (%)

†Presented as mean (S.D)

**Table S3. Associations of Obesity, Metabolic Health Status, and Coefficient of Variability-Defined Variability of Body Mass Index and Metabolic Health with Risk of Incident Obesity and Metabolically Unhealthy State, Framingham Offspring Examination 4-Examination 9.**

|                  | Incident Obesity |         |      |            |                          | Incident Metabolically Unhealthy State |         |      |            |                          |
|------------------|------------------|---------|------|------------|--------------------------|----------------------------------------|---------|------|------------|--------------------------|
|                  | Cases            | Rate*   | HR†  | 95% CI     | $P_{\text{difference}}‡$ | Cases                                  | Rate*   | HR†  | 95% CI     | $P_{\text{difference}}§$ |
| Obesity          |                  |         |      |            |                          |                                        |         |      |            |                          |
| SNO              | 397              | 498.5   | 1.00 | Reference  | <0.0001                  | 505                                    | 1,290.6 | 1.00 | Reference  | <0.0001                  |
| VNO              | 170              | 1,882.6 | 3.47 | 2.67, 4.53 |                          | 95                                     | 2,004.2 | 1.75 | 1.32, 2.32 |                          |
| SO               |                  |         |      |            |                          | 80                                     | 2,564.1 | 1.84 | 1.37, 2.48 | 0.30                     |
| VO               |                  |         |      |            |                          | 79                                     | 2,668.9 | 2.27 | 1.69, 3.05 |                          |
| Metabolic health |                  |         |      |            |                          |                                        |         |      |            |                          |
| SMH              | 247              | 511.1   | 1.00 | Reference  | 0.45                     | 599                                    | 1,484.9 | 1.00 | Reference  | 0.60                     |
| VMH              | 69               | 552.0   | 1.12 | 0.84, 1.48 |                          | 160                                    | 1664.9  | 1.06 | 0.86, 1.29 |                          |
| SMU              | 152              | 883.7   | 1.64 | 1.27, 2.13 | 0.21                     |                                        |         |      |            |                          |
| VMU              | 89               | 963.2   | 2.00 | 1.53, 2.60 |                          |                                        |         |      |            |                          |

---

CI, confidence interval; HR, hazard ratio; SMH, stable metabolic health, metabolically healthy; SMU, stable metabolic health, metabolically unhealthy; SNO, stable BMI, without obesity; SO, stable BMI, with obesity; VMH, variable metabolic health, metabolically healthy; VMU, variable metabolic health, metabolically unhealthy; VNO, variable BMI, without obesity; VO, variable BMI, with obesity.

\*Crude rate per 10,000 person-periods.

†Adjusted for age, sex, examination, education, smoking status, physical activity index, and BMI.

‡P-value comparing association of stability with diabetes to that of variability within a given obesity/metabolic health status

§Adjusted for age, sex, examination, education, smoking status, physical activity index, systolic blood pressure, diastolic blood pressure, current antihypertensive medication use, HDL, triglycerides, blood glucose, current use of antidiabetic medication.

**Table S4. Associations of Obesity, Metabolic Health Status, and Coefficient of Variability-Defined Variability of Body Mass Index and Metabolic Health with Risk of Incident Diabetes and Hypertension, Framingham Offspring Examination 4-Examination 9.**

|                         | Incident Diabetes |       |      |            |                                 | Incident Hypertension |         |      |            |                                 |
|-------------------------|-------------------|-------|------|------------|---------------------------------|-----------------------|---------|------|------------|---------------------------------|
|                         | Cases             | Rate* | HR†  | 95% CI     | <i>P</i> <sub>difference‡</sub> | Cases                 | Rate*   | HR†  | 95% CI     | <i>P</i> <sub>difference‡</sub> |
| <b>Obesity</b>          |                   |       |      |            |                                 |                       |         |      |            |                                 |
| SNO                     | 113               | 135.0 | 1.00 | Reference  | 0.009                           | 324                   | 1,682.2 | 1.00 | Reference  | 0.002                           |
| VNO                     | 25                | 211.1 | 1.92 | 1.18, 3.14 |                                 | 85                    | 2,698.4 | 1.67 | 1.21, 2.31 |                                 |
| SO                      | 92                | 555.6 | 3.05 | 2.24, 4.15 | 0.87                            | 33                    | 4,177.2 | 2.46 | 1.39, 4.37 | 0.70                            |
| VO                      | 42                | 361.4 | 2.94 | 1.94, 4.46 |                                 | 61                    | 4,326.2 | 2.15 | 1.41, 3.28 |                                 |
| <b>Metabolic health</b> |                   |       |      |            |                                 |                       |         |      |            |                                 |
| SMH                     | 68                | 101.9 | 1.00 | Reference  | 0.93                            | 350                   | 1,909.4 | 1.00 | Reference  | 0.35                            |
| VMH                     | 13                | 104.0 | 0.97 | 0.53, 1.79 |                                 | 75                    | 1,879.7 | 0.87 | 0.65, 1.17 |                                 |
| SMU                     | 147               | 477.7 | 3.33 | 2.41, 4.60 | 0.21                            | 50                    | 3,546.1 | 1.74 | 1.19, 2.54 | 0.46                            |
| VMU                     | 41                | 344.8 | 2.62 | 1.71, 4.01 |                                 | 21                    | 3,962.3 | 1.30 | 0.64, 2.65 |                                 |

---

CI, confidence interval; HR, hazard ratio; SMH, stable metabolic health, metabolically healthy; SMU, stable metabolic health, metabolically unhealthy; SNO, stable BMI, without obesity; SO, stable BMI, with obesity; VMH, variable metabolic health, metabolically healthy; VMU, variable metabolic health, metabolically unhealthy; VNO, variable BMI, without obesity; VO, variable BMI, with obesity.

\*Crude rate per 10,000 person-periods

†Adjusted for age, sex, examination, education, smoking status, and physical activity index

‡P-value comparing association of stability with diabetes to that of variability within a given obesity/metabolic health status

**Table S5. Associations of Obesity, Metabolic Health Status, and Coefficient of Variability-Defined Variability of Body Mass Index and Metabolic Health with Risk of Incident Cardiovascular Disease and Chronic Kidney Disease, Framingham Offspring Examination 4-Examination 9.**

|                         | Incident Cardiovascular Disease |       |      |            |                                 | Incident Chronic Kidney Disease |       |      |            |                                 |
|-------------------------|---------------------------------|-------|------|------------|---------------------------------|---------------------------------|-------|------|------------|---------------------------------|
|                         | Cases                           | Rate* | HR†  | 95% CI     | <i>P</i> <sub>difference‡</sub> | Cases                           | Rate* | HR†  | 95% CI     | <i>P</i> <sub>difference‡</sub> |
| <b>Obesity</b>          |                                 |       |      |            |                                 |                                 |       |      |            |                                 |
| SNO                     | 351                             | 90.7  | 1.00 | Reference  | 0.38                            | 114                             | 184.3 | 1.00 | Reference  | 0.87                            |
| VNO                     | 30                              | 51.3  | 0.84 | 0.57, 1.34 |                                 | 9                               | 90.0  | 0.94 | 0.44, 2.00 |                                 |
| SO                      | 143                             | 156.0 | 1.25 | 1.03, 1.53 | 0.98                            | 52                              | 344.8 | 1.47 | 1.00, 2.15 | 0.95                            |
| VO                      | 64                              | 98.8  | 1.25 | 0.94, 1.65 |                                 | 20                              | 174.1 | 1.44 | 0.84, 2.47 |                                 |
| <b>Metabolic health</b> |                                 |       |      |            |                                 |                                 |       |      |            |                                 |
| SMH                     | 180                             | 59.6  | 1.00 | Reference  | 0.44                            | 55                              | 122.6 | 1.00 | Reference  | 0.57                            |
| VMH                     | 40                              | 70.3  | 1.14 | 0.81, 1.61 |                                 | 16                              | 114.4 | 0.85 | 0.48, 1.50 |                                 |
| SMU                     | 220                             | 138.3 | 1.68 | 1.37, 2.06 | 0.0006                          | 58                              | 256.0 | 1.26 | 0.84, 1.91 | 0.01                            |
| VMU                     | 145                             | 190.4 | 2.44 | 1.94, 3.06 |                                 | 65                              | 398.3 | 2.11 | 1.39, 3.21 |                                 |

---

CI, confidence interval; CKD, chronic kidney disease; CVD, cardiovascular disease; HR, hazard ratio; SMH, stable metabolic health, metabolically healthy; SMU, stable metabolic health, metabolically unhealthy; SNO, stable BMI, without obesity; SO, stable BMI, with obesity; VMH, variable metabolic health, metabolically healthy; VMU, variable metabolic health, metabolically unhealthy; VNO, variable BMI, without obesity; VO, variable BMI, with obesity.

\*Crude rate per 10,000 person-years

†Adjusted for age, sex, examination, education, smoking status, and physical activity index

‡P-value comparing association of stability with diabetes to that of variability within a given obesity/metabolic health status

§Crude rate per 10,000 person-periods

**Table S6. Inverse Probability of Censoring-Weighted Associations of Obesity Sub-phenotypes with Risk of Obesity and Becoming Metabolically Unhealthy, Framingham Offspring Examination 4- Examination 9.**

| Obesity Subphenotypes | Cases             | Rate* | HR†   | 95% CI      | $P_{\text{Interaction}\ddagger}$ | Cases                                  | Rate*   | HR†   | 95% CI      | $P_{\text{Interaction}\S}$ |
|-----------------------|-------------------|-------|-------|-------------|----------------------------------|----------------------------------------|---------|-------|-------------|----------------------------|
|                       | Incident Obesity  |       |       |             |                                  | Incident Metabolically Unhealthy State |         |       |             |                            |
| MHNO                  | 316               | 519.5 | 1.00  | Reference   |                                  | 605                                    | 1,378.8 | 1.00  | Reference   |                            |
| MUNO                  | 241               | 911.5 | 1.98  | 1.63, 2.39  |                                  |                                        |         |       |             |                            |
| MHO                   |                   |       |       |             |                                  | 166                                    | 2,707.9 | 2.02  | 1.64, 2.50  |                            |
| MUO                   |                   |       |       |             |                                  |                                        |         |       |             |                            |
|                       | Incident Diabetes |       |       |             |                                  | Incident Hypertension                  |         |       |             |                            |
| MHNO                  | 49                | 73.7  | 1.00  | Reference   |                                  | 358                                    | 1,737.0 | 1.00  | Reference   |                            |
| MUNO                  | 88                | 320.2 | 4.94  | 3.27, 7.45  |                                  | 45                                     | 2,125.0 | 1.89  | 1.35, 2.65  |                            |
| MHO                   | 32                | 253.2 | 4.45  | 2.71, 7.29  |                                  | 67                                     | 4,012.0 | 2.19  | 1.66, 2.89  |                            |
| MUO                   | 100               | 664.9 | 10.49 | 7.07, 15.55 |                                  | 25                                     | 5,102.0 | 2.31  | 1.47, 3.62  |                            |
| Obesity x MU          |                   |       | 0.48  | 0.27, 0.86  | 0.01                             |                                        |         | 0.56  | 0.31, 1.01  | 0.05                       |
| Obesity+MU            |                   |       | 1.73  | -0.80, 4.27 | 0.18                             |                                        |         | -0.77 | -1.77, 0.22 | 0.13                       |

|              | Cases                           | Rate*  | HR†  | 95% CI      | $P_{\text{interaction}}‡$ | Cases                           | Rate* | HR†  | 95% CI     | $P_{\text{interaction}}§$ |
|--------------|---------------------------------|--------|------|-------------|---------------------------|---------------------------------|-------|------|------------|---------------------------|
|              | Incident Cardiovascular Disease |        |      |             |                           | Incident Chronic Kidney Disease |       |      |            |                           |
| MHNO         | 170                             | 29,717 | 1.00 | Reference   |                           | 53                              | 4811  | 1.00 | Reference  |                           |
| MUNO         | 207                             | 14,158 | 1.74 | 1.38, 2.20  |                           | 69                              | 2317  | 1.75 | 1.18, 2.59 |                           |
| MHO          | 50                              | 6,113  | 1.33 | 0.93, 1.91  |                           | 18                              | 1065  | 1.60 | 0.87, 2.93 |                           |
| MUO          | 157                             | 9,304  | 2.45 | 1.90, 3.16  |                           | 54                              | 1570  | 2.97 | 1.94, 4.56 |                           |
| Obesity x MU |                                 |        | 1.06 | 0.79, 1.42  | 0.71                      |                                 |       | 1.06 | 0.51, 2.21 | 0.87                      |
| Obeisty+MU   |                                 |        | 0.06 | -0.35, 0.47 | 0.79                      |                                 |       | 0.62 | 0.10, 1.15 | 0.02                      |

CI, confidence interval; HR, hazard ratio; SMH, stable metabolic health, metabolically healthy; SMU, stable metabolic health, metabolically unhealthy; RERI, relative excess risk due to interaction; SNO, stable BMI, without obesity; SO, stable BMI, with obesity; VMH, variable metabolic health, metabolically healthy; VMU, variable metabolic health, metabolically unhealthy; VNO, variable BMI, without obesity; VO, variable BMI, with obesity.

\*Crude rate per 10,000 person-periods.

†Adjusted for age, sex, exam, education, smoking status, physical activity index, and BMI.

‡P-value for the multiplicative interaction between obesity and the metabolically unhealthy state

---

§Adjusted for age, sex, exam, education, smoking status, physical activity index, systolic blood pressure, diastolic blood pressure, current antihypertensive medication use, HDL, triglycerides, blood glucose, current use of antidiabetic medication.

**Table S7. Inverse Probability of Censoring-Weighted Associations of Obesity, Metabolic Health Status, and Variability of Body Mass Index and Metabolic Health with Risk of Incident Obesity and Metabolically Unhealthy State, Framingham Offspring Examination 4- Examination 9.**

|                  | Incident Obesity |         |      |            |                          | Incident Metabolically Unhealthy State |         |      |            |                          |
|------------------|------------------|---------|------|------------|--------------------------|----------------------------------------|---------|------|------------|--------------------------|
|                  | Cases            | Rate*   | HR†  | 95% CI     | $P_{\text{difference}}‡$ | Cases                                  | Rate*   | HR§  | 95% CI     | $P_{\text{difference}}§$ |
| Obesity          |                  |         |      |            |                          |                                        |         |      |            |                          |
| SNO              | 390              | 510.3   | 1.00 | Reference  | 0.04                     | 483                                    | 1,291.4 | 1.00 | Reference  | <0.0001                  |
| VNO              | 177              | 1,444.9 | 1.26 | 1.01, 1.59 |                          | 122                                    | 1,882.7 | 1.65 | 1.29, 2.11 |                          |
| SO               |                  |         |      |            |                          | 97                                     | 2,607.5 | 1.15 | 0.87, 1.51 | 0.02                     |
| VO               |                  |         |      |            |                          | 69                                     | 2,863.1 | 1.89 | 1.35, 2.65 |                          |
| Metabolic health |                  |         |      |            |                          |                                        |         |      |            |                          |
| SMH              | 247              | 501.9   | 1.00 | Reference  | 0.12                     | 629                                    | 1534.9  | 1.00 | Reference  | 0.71                     |
| VMH              | 69               | 593.8   | 1.25 | 0.94, 1.67 |                          | 142                                    | 1572.5  | 1.08 | 0.83, 1.31 |                          |
| SMU              | 160              | 808.5   | 0.92 | 0.74, 1.13 | 0.49                     |                                        |         |      |            |                          |
| VMU              | 81               | 1,218.0 | 1.02 | 0.77, 1.33 |                          |                                        |         |      |            |                          |

CI, confidence interval; HR, hazard ratio; SMH, stable metabolic health, metabolically healthy; SMU, stable metabolic health, metabolically unhealthy; SNO, stable BMI, without obesity; SO, stable BMI, with obesity; VMH, variable metabolic health,

---

metabolically healthy; VMU, variable metabolic health, metabolically unhealthy; VNO, variable BMI, without obesity; VO, variable BMI, with obesity.

\*Crude rate per 10,000 person-periods.

†Adjusted for age, sex, examination, education, smoking status, physical activity index, and BMI.

‡P-value comparing association of stability with diabetes to that of variability within a given obesity/metabolic health status

§Adjusted for age, sex, examination, education, smoking status, physical activity index, systolic blood pressure, diastolic blood pressure, current antihypertensive medication use, HDL, triglycerides, blood glucose, current use of antidiabetic medication.

**Table S8. Inverse Probability of Censoring-Weighted Associations of Obesity, Metabolic Health Status, and Variability of Body Mass Index and Metabolic Health with Risk of Incident Diabetes and Hypertension, Framingham Offspring Examination 4-Examination 9.**

|                         | Incident Diabetes |       |      |            |                          | Incident Hypertension |         |      |            |                          |
|-------------------------|-------------------|-------|------|------------|--------------------------|-----------------------|---------|------|------------|--------------------------|
|                         | Cases             | Rate* | HR†  | 95% CI     | $P_{\text{difference}}‡$ | Cases                 | Rate*   | HR†  | 95% CI     | $P_{\text{difference}}§$ |
| <b>Obesity</b>          |                   |       |      |            |                          |                       |         |      |            |                          |
| SNO                     | 109               | 121.1 | 1.00 | Reference  | 0.004                    | 301                   | 1,659.3 | 1.00 | Reference  | <0.0001                  |
| VNO                     | 29                | 171.3 | 2.00 | 1.24, 3.21 |                          | 108                   | 2,529.3 | 1.67 | 1.31, 2.13 |                          |
| SO                      | 103               | 482.2 | 3.30 | 2.39, 4.55 | 0.62                     | 41                    | 3,831.8 | 1.86 | 1.29, 2.68 | 0.15                     |
| VO                      | 31                | 282.1 | 2.86 | 1.76, 4.67 |                          | 53                    | 4,690.3 | 2.60 | 1.88, 3.59 |                          |
| <b>Metabolic health</b> |                   |       |      |            |                          |                       |         |      |            |                          |
| SMH                     | 70                | 109.9 | 1.00 | Reference  | 0.09                     | 338                   | 1,860.2 | 1.00 | Reference  | 0.28                     |
| VMH                     | 11                | 70.8  | 0.55 | 0.28, 1.10 |                          | 87                    | 2,096.4 | 1.16 | 0.90, 1.50 |                          |
| SMU                     | 152               | 476.3 | 3.47 | 2.46, 4.90 | 0.49                     | 50                    | 3,448.3 | 1.50 | 1.04, 2.19 | 0.46                     |
| VMU                     | 36                | 334.9 | 3.01 | 1.91, 4.75 |                          | 21                    | 4,285.7 | 1.84 | 1.21, 2.80 |                          |

---

CI, confidence interval; HR, hazard ratio; SMH, stable metabolic health, metabolically healthy; SMU, stable metabolic health, metabolically unhealthy; SNO, stable BMI, without obesity; SO, stable BMI, with obesity; VMH, variable metabolic health, metabolically healthy; VMU, variable metabolic health, metabolically unhealthy; VNO, variable BMI, without obesity; VO, variable BMI, with obesity.

\*Crude rate per 10,000 person-periods

†Adjusted for age, sex, examination, education, smoking status, and physical activity index

‡P-value comparing association of stability with diabetes to that of variability within a given obesity/metabolic health status

**Table S9. Inverse Probability of Censoring-Weighted Associations of Obesity, Metabolic Health Status, and Variability of Body Mass Index and Metabolic Health with Risk of Incident Cardiovascular Disease and Chronic Kidney Disease, Framingham Offspring Examination 4-Examination 9.**

|                         | Incident Cardiovascular Disease |       |      |            |                                 | Incident Chronic Kidney Disease |       |      |            |                                 |
|-------------------------|---------------------------------|-------|------|------------|---------------------------------|---------------------------------|-------|------|------------|---------------------------------|
|                         | Cases                           | Rate* | HR†  | 95% CI     | <i>P</i> <sub>difference‡</sub> | Cases                           | Rate* | HR†  | 95% CI     | <i>P</i> <sub>difference‡</sub> |
| <b>Obesity</b>          |                                 |       |      |            |                                 |                                 |       |      |            |                                 |
| SNO                     | 344                             | 92.2  | 1.00 | Reference  | 0.41                            | 113                             | 190.1 | 1.00 | Reference  | 0.75                            |
| VNO                     | 37                              | 51.2  | 0.84 | 0.57, 1.25 |                                 | 10                              | 80.5  | 0.88 | 0.41, 1.88 |                                 |
| SO                      | 157                             | 149.3 | 1.31 | 1.04, 1.63 | 0.55                            | 61                              | 350.2 | 1.71 | 1.20, 2.45 | 0.70                            |
| VO                      | 50                              | 97.4  | 1.47 | 1.03, 2.12 |                                 | 11                              | 63.1  | 1.47 | 0.71, 3.04 |                                 |
| <b>Metabolic health</b> |                                 |       |      |            |                                 |                                 |       |      |            |                                 |
| SMH                     | 179                             | 61.9  | 1.00 | Reference  | 0.69                            | 60                              | 125.5 | 1.00 | Reference  | 0.84                            |
| VMH                     | 41                              | 58.8  | 1.08 | 0.73, 1.59 |                                 | 11                              | 99.7  | 0.93 | 0.44, 1.97 |                                 |
| SMU                     | 252                             | 149.4 | 1.72 | 1.37, 2.15 | 0.24                            | 80                              | 288.9 | 1.66 | 1.14, 2.42 | 0.31                            |
| VMU                     | 113                             | 169.8 | 2.01 | 1.53, 2.65 |                                 | 43                              | 380.9 | 2.07 | 1.31, 3.28 |                                 |

---

CI, confidence interval; HR, hazard ratio; SMH, stable metabolic health, metabolically healthy; SMU, stable metabolic health, metabolically unhealthy; SNO, stable BMI, without obesity; SO, stable BMI, with obesity; VMH, variable metabolic health, metabolically healthy; VMU, variable metabolic health, metabolically unhealthy; VNO, variable BMI, without obesity; VO, variable BMI, with obesity.

\*Crude rate per 10,000 person-periods

†Adjusted for age, sex, examination, education, smoking status, and physical activity index

‡P-value comparing association of stability with diabetes to that of variability within a given obesity/metabolic health status

§Crude rate per 10,000 person-periods
